# Supplementary material for: Mixed anionic surfactant-templated mesoporous silica nanoparticles for fluorescence detection of Fe3+
Source: Royal Society of Chemistry journal article supplement (doi:10.1039/c5dt03052h), 2015-11-17
Supplement: c5dt03052h1.pdf [file c5dt03052h1.pdf]

## Mixed anionic surfactants-templated mesoporous silica nanoparticles for fluorescent detection of Fe<sup>3+</sup>

Fangyuan Gai,<sup>\*abc</sup> Tianlei Zhou,<sup>d</sup> Guang Chu,<sup>c</sup> Ye Li,<sup>e</sup> Yunling Liu,<sup>c</sup> Qisheng Huo<sup>c</sup> and Farid Akhtar<sup>\*b</sup>

<sup>a</sup>Department of Petroleum and Chemical Engineering, Dalian University of Technology, 2 Dagong Road, New District of Liaodong Bay, Panjin 124221, China; E-mail: [gaifangyuan@dlut.edu.cn](mailto:gaifangyuan@dlut.edu.cn)

<sup>b</sup>Division of Materials Science, Luleå University of Technology, SE-97187 Luleå, Sweden

<sup>c</sup>State Key Laboratory of Inorganic Synthesis and Preparative Chemistry, College of Chemistry, Jilin University, Changchun 130012, Tel: +86-431-85168602

<sup>d</sup>Chemical & Materials Engineering Department, University of Nevada at Reno, Reno, NV, 89507, United State

<sup>e</sup>Institute of Chemical Materials, China Academy of Engineering Physics, Mianyang, Sichuan 621900, People's Republic of China

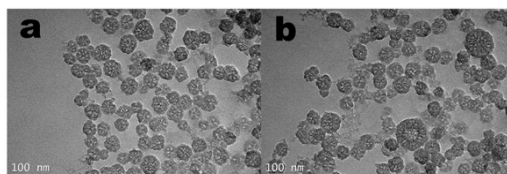

Fig.S1 (a) and (b) at different stirring reaction rates, (b) suggested that the nucleation process could form bigger nanoparticles

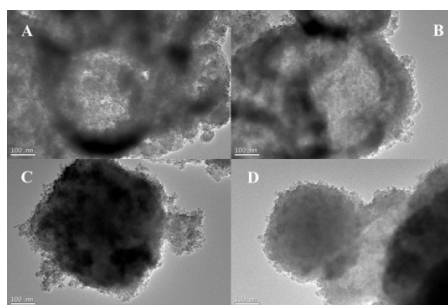

Fig.S2 (a) and (b) SDS-templated big vesicle without APTS( $2.5 \times 10^{-4}$  mol of SDS, 8.75 mL of H<sub>2</sub>O and 0.5 g HCl (0.1 M) mixed together in a vial, after stirring for half an hour, added with 0.375 mL of TEOS, and keep stirring for 4 h), (c) and (d) SDBS and silica precursor formed big blocks of silica gel without APTS( $2.5 \times 10^{-4}$  mol of SDBS, 8.75 mL of H<sub>2</sub>O and 0.5 g HCl (0.1 M) mixed together in a vial, after stirring for half an hour, added with 0.375 mL of TEOS, and keep stirring for 4 h)

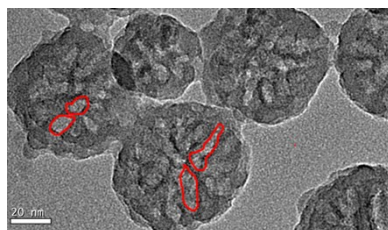

Fig.S3 The mark of mesopores on TEM image (the red line)

Fe<sup>3+</sup> sensing experiment condition and the selectivity detection details:

1. selective detection of Fe<sup>3+</sup>: the concentration of each cation is 10 ppm
2. The selectivity and the Fe<sup>3+</sup> sensing experiment have been proposed in the neutral condition with the pH around 6-7 tested by pH paper, the distilled water have been used to avoid the influence of anions
